# Supplementary material
Source: Elsevier journal article supplement (https://comptes-rendus.academie-sciences.fr/chimie/article/10.1016/j.crci.2010.03.019/file/attach/mmc1.pdf)
Supplement: mmc1 [file mmc1.pdf]

# checkCIF/PLATON report (basic structural check)

No syntax errors found.

Please wait while processing ....

[CIF dictionary](#)

[Interpreting this report](#)

## Datablock: Compound2c

Bond precision: C-C = 0.0019 A Wavelength=0.71073  
Cell: a=11.8277(4) b=7.4655(3) c=24.1851(9)  
alpha=90 beta=97.166(1) gamma=90

Temperature: 100 K

|                        | Calculated     | Reported       |
|------------------------|----------------|----------------|
| Volume                 | 2118.86(14)    | 2118.86(14)    |
| Space group            | P 21/c         | P 21/c         |
| Hall group             | -P 2ybc        | -P 2ybc        |
| Moiety formula         | C17 H37 Al2 Sm | C17 H37 Al2 Sm |
| Sum formula            | C17 H37 Al2 Sm | C17 H37 Al2 Sm |
| Mr                     | 445.79         | 445.78         |
| Dx, g cm <sup>-3</sup> | 1.398          | 1.397          |
| Z                      | 4              | 4              |
| Mu (mm <sup>-1</sup> ) | 2.846          | 2.846          |
| F000                   | 908.0          | 908.0          |
| F000'                  | 907.99         |                |
| h, k, lmax             | 16, 10, 34     | 16, 10, 34     |
| Nref                   | 6242           | 6225           |
| Tmin, Tmax             | 0.315, 0.796   | 0.378, 0.815   |
| Tmin'                  | 0.283          |                |

Correction method= MULTI-SCAN

Data completeness= 0.997 Theta(max)= 30.110

R(reflections)= 0.0165( 6015) wR2(reflections)= 0.0407( 6225)

S = 1.192 Npar= 242

The following ALERTS were generated. Each ALERT has the format

**test-name ALERT alert-type alert-level.**

Click on the hyperlinks for more details of the test.

### Alert level A

|                                   |                     |                  |             |
|-----------------------------------|---------------------|------------------|-------------|
| <a href="#">PLAT390_ALERT_3_A</a> | Deviating Methyl C1 | X-C-H Bond Angle | 64.10 Deg.  |
| <a href="#">PLAT390_ALERT_3_A</a> | Deviating Methyl C1 | X-C-H Bond Angle | 138.50 Deg. |
| <a href="#">PLAT390_ALERT_3_A</a> | Deviating Methyl C1 | X-C-H Bond Angle | 133.20 Deg. |
| <a href="#">PLAT390_ALERT_3_A</a> | Deviating Methyl C1 | X-C-H Bond Angle | 93.20 Deg.  |
| <a href="#">PLAT390_ALERT_3_A</a> | Deviating Methyl C2 | X-C-H Bond Angle | 137.40 Deg. |
| <a href="#">PLAT390_ALERT_3_A</a> | Deviating Methyl C2 | X-C-H Bond Angle | 64.70 Deg.  |
| <a href="#">PLAT390_ALERT_3_A</a> | Deviating Methyl C2 | X-C-H Bond Angle | 94.70 Deg.  |
| <a href="#">PLAT390_ALERT_3_A</a> | Deviating Methyl C2 | X-C-H Bond Angle | 133.40 Deg. |
| <a href="#">PLAT390_ALERT_3_A</a> | Deviating Methyl C4 | X-C-H Bond Angle | 125.20 Deg. |
| <a href="#">PLAT390_ALERT_3_A</a> | Deviating Methyl C5 | X-C-H Bond Angle | 169.80 Deg. |
| <a href="#">PLAT390_ALERT_3_A</a> | Deviating Methyl C5 | X-C-H Bond Angle | 72.70 Deg.  |
| <a href="#">PLAT390_ALERT_3_A</a> | Deviating Methyl C5 | X-C-H Bond Angle | 84.10 Deg.  |
| <a href="#">PLAT390_ALERT_3_A</a> | Deviating Methyl C5 | X-C-H Bond Angle | 91.20 Deg.  |
| <a href="#">PLAT390_ALERT_3_A</a> | Deviating Methyl C5 | X-C-H Bond Angle | 127.80 Deg. |
| <a href="#">PLAT390_ALERT_3_A</a> | Deviating Methyl C6 | X-C-H Bond Angle | 73.70 Deg.  |
| <a href="#">PLAT390_ALERT_3_A</a> | Deviating Methyl C6 | X-C-H Bond Angle | 170.30 Deg. |
| <a href="#">PLAT390_ALERT_3_A</a> | Deviating Methyl C6 | X-C-H Bond Angle | 84.30 Deg.  |
| <a href="#">PLAT390_ALERT_3_A</a> | Deviating Methyl C6 | X-C-H Bond Angle | 128.80 Deg. |
| <a href="#">PLAT390_ALERT_3_A</a> | Deviating Methyl C6 | X-C-H Bond Angle | 89.90 Deg.  |

---

### ● Alert level B

[PLAT222\\_ALERT\\_3\\_B](#) Large Non-Solvent H Ueq(max)/Ueq(min) ... 4.25 Ratio

---

### ● Alert level C

[PLAT390\\_ALERT\\_3\\_C](#) Deviating Methyl C5 X-C-H Bond Angle ..... 117.30 Deg.

[PLAT390\\_ALERT\\_3\\_C](#) Deviating Methyl C6 X-C-H Bond Angle ..... 116.60 Deg.

---

### ● Alert level G

[PLAT860\\_ALERT\\_3\\_G](#) Note: Number of Least-Squares Restraints ..... 30

[PLAT164\\_ALERT\\_4\\_G](#) Nr. of Refined C-H H-Atoms in Heavy-Atom Struct. 16

---

19 **ALERT level A** = In general: serious problem

1 **ALERT level B** = Potentially serious problem

2 **ALERT level C** = Check and explain

2 **ALERT level G** = General alerts; check

0 ALERT type 1 CIF construction/syntax error, inconsistent or missing data

0 ALERT type 2 Indicator that the structure model may be wrong or deficient

23 ALERT type 3 Indicator that the structure quality may be low

1 ALERT type 4 Improvement, methodology, query or suggestion

0 ALERT type 5 Informative message, check

---

## Publication of your CIF in IUCr journals

A basic structural check has been run on your CIF. These basic checks will be run on all CIFs submitted for publication in IUCr journals (*Acta Crystallographica*, *Journal of Applied Crystallography*, *Journal of Synchrotron Radiation*); however, if you intend to submit to *Acta Crystallographica Section C* or *E*, you should make sure that [full publication checks](#) are run on the final version of your CIF prior to submission.

## Publication of your CIF in other journals

Please refer to the *Notes for Authors* of the relevant journal for any special instructions relating to CIF submission.

---

PLATON version of 13/08/2009; check.def file version of 12/08/2009

## Datablock Compound2c - ellipsoid plot

7 Y

PLATON-Dec 13 18:39:13 2009 - (130809)

NOMOVE FORCED

Prob = 50  
Temp = 100

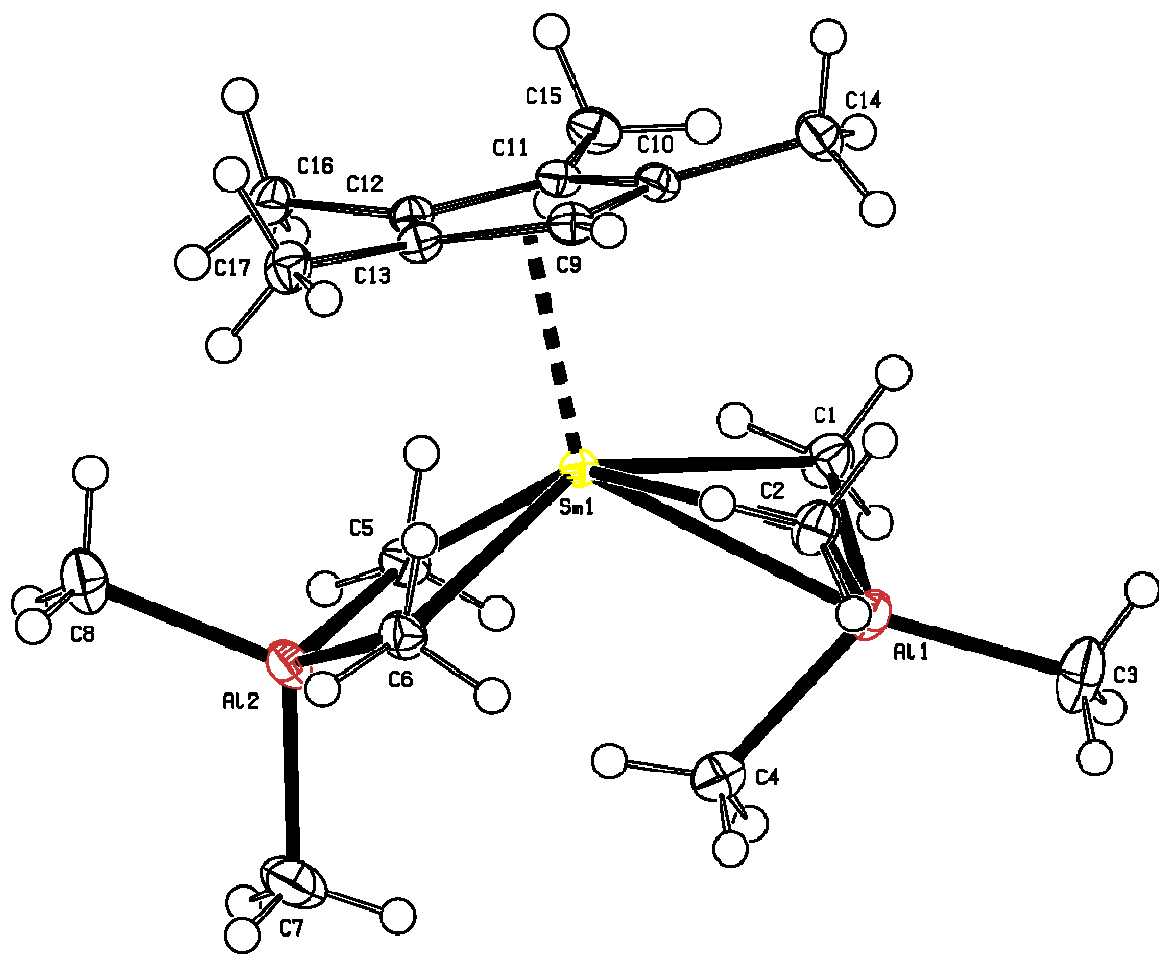

Z -150

Compound2cP 21/c

R = 0.02

RES= 0 -77 X

[Download CIF editor \(publCIF\) from the IUCr](#)  
[Download CIF editor \(enCIFer\) from the CCDC](#)  
[Test a new CIF entry](#)
